# Supplementary material for: Chain structure and β conformation of poly(9,9-dioctylfluorene) (PFO) with different molecular weights delivering from the solution to the film in a drop-casting process
Source: Royal Society of Chemistry journal article supplement (doi:10.1039/d2cp03408e), 2022-01-01
Supplement: d2cp03408e1.pdf [file d2cp03408e1.pdf]

# Chain Structure and $\beta$ Conformation of Poly (9,9-dioctylfluorene) (PFO) with Different Molecular Weight Delivering from Solution to Film in Drop-casting Process

*Tao Li,<sup>a,b</sup> Qilong He,<sup>a</sup> Yanan Guo,<sup>c</sup> Yijia Guan,<sup>\*a</sup> Yuhua Zhang,<sup>a</sup> Weijie Cao,<sup>a</sup> Jieyi Qin,<sup>a</sup> Jianguo Liao,<sup>a</sup> Xuemao Guan,<sup>a</sup> and Dan Lu<sup>\*c</sup>*

<sup>a</sup> School of Materials Science and Engineering, Henan Polytechnic University, Henan, Jiaozuo 454000, China.

<sup>b</sup> SDU NanoSYD, Mads Clausen Institute, University of Southern Denmark, Alsion 2, Sønderborg DK-6400, Denmark.

<sup>c</sup> State Key Laboratory of Supramolecular Structure and Materials, College of Chemistry, Jilin University, 2699 Qianjin Avenue, Changchun, China.

## Supporting information

### 1. The calculation method of the proportion of $\beta$ -conformation in PFO film<sup>1</sup>.

The proportion of  $\beta$  conformation in PFO film can be calculated according to Lambert-Beer's law (Eq. S1), where  $c_\alpha$  and  $c_\beta$  are the concentrations of  $\alpha$  conformation and  $\beta$  conformation, respectively,  $A$  (obtained from experiments) is the absorbency and  $\varepsilon$  is the absorption coefficient. In UV-vis absorption spectra of PFO films, it is difficult to obtain the  $\varepsilon$  for  $\alpha$  conformation and  $\beta$  conformation. Thus, we used the method of molecular simulation to the absorption spectra to calculate the proportion of  $\varepsilon_\beta/\varepsilon_\alpha^2$ .

$$\alpha\% + \beta\% = 1 \quad (\text{S1})$$

$$\beta\% = \frac{c_\beta}{c_\beta + c_\alpha} = \frac{A_\beta \times \varepsilon_\alpha}{A_\beta \times \varepsilon_\alpha + A_\alpha \times \varepsilon_\beta} \quad (\text{S2})$$

By defining six monomer units as the conjugation length<sup>3</sup>, we optimized the symmetry geometries of PFO chains for the approximate calculation of  $\varepsilon$  using Density Functional Theory (DFT)<sup>4</sup>. To calculate the oscillator strengths (f), Time-Dependent Density Functional Theory (TD-DFT) was used<sup>5</sup>, as this method has been found to give reliable results<sup>6</sup>. DFT and TD-DFT are both with a B3LYP hybrid functional basis set level of 6-31G\*<sup>7</sup>. All calculations were performed using the Gaussian 03 package<sup>7</sup>. The oscillator strengths (f) of the two conformations are 4.46 for

$\alpha$  conformation at 386 nm and 4.83 for  $\beta$  conformation at 437 nm. Thus, the proportion of  $\varepsilon_\beta/\varepsilon_\alpha$  can be obtained from Eq. S3 and Eq. S4, where  $k$  is a constant and  $\nu$  is the vibration frequency of two conformations. We can approximately calculate the proportion of  $\beta$  conformation in each UV-vis absorption spectra of PFO films using Eq. S2 and Eq. S4. Then the proportion of  $\alpha$  conformation can be easily got by Eq. S1.

$$f = k \int \varepsilon dv, \quad f \propto \varepsilon \quad (S3)$$

$$\frac{\varepsilon_\beta}{\varepsilon_\alpha} = \frac{f_\beta}{f_\alpha} = \frac{4.83}{4.46} = 1.08 \quad (S4)$$

## 2. Calculation method of the aggregates of fractal dimension ( $d_f$ ) in solution by static light scattering (SLS)

In solution, the scattering intensity of polymer aggregates has the following power relationship with the test angle:

$$I(q) = (K/R_s) C M_{app} (q R_{app})^{-d_f}$$

Where  $I(q)$  is the scattering light intensity,  $K$  is a constant factor,  $R_s$  is the solvent Rayleigh ratio,  $C$  is the polymer concentration,  $q$  is the scattering vector and  $M_{app}$  and  $R_{app}$  are the apparent mass and apparent radius, respectively. The fractal dimension  $d_f$  of the aggregation can be obtained from  $I(q)$  and  $q^{-d_f}$ .

## 3. Influence of Concentration on the $\beta$ Conformation Formation of PFO in pure THF solvent.

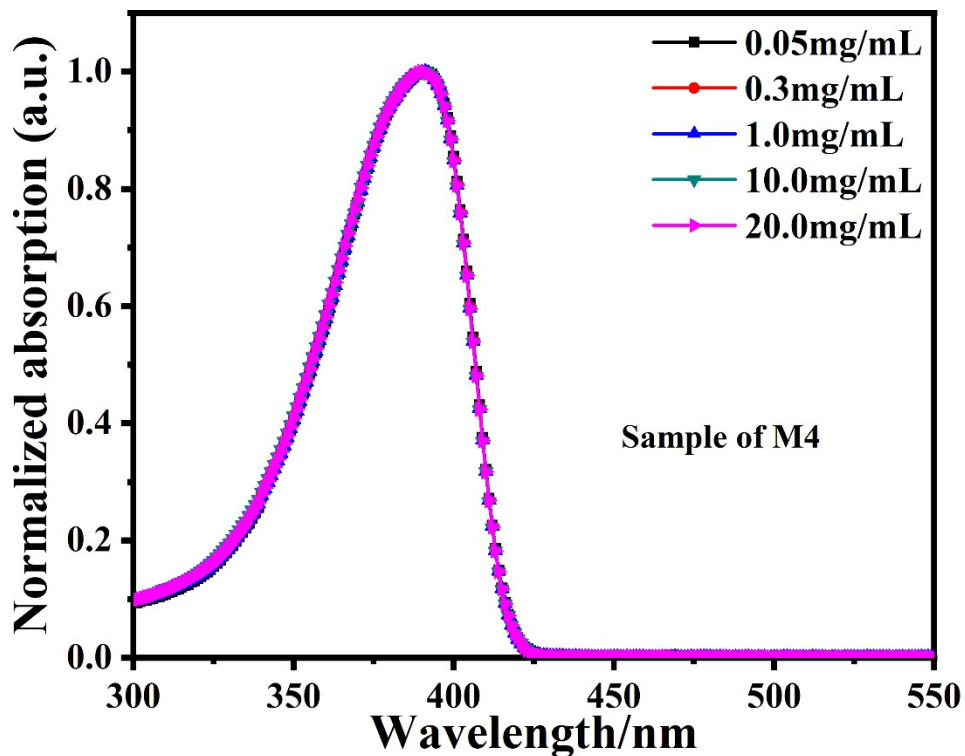

Figure S1. Normalized UV-vis absorption spectra of sample of M4 at different concentrations of THF solutions

#### 4. Relationship between the volatilization time and the $\beta$ conformation contents which were calculated from Figure 9a and Figure 9c.

Table S1. the  $\beta$  conformation contents which were calculated from the normalized UV-vis absorption spectra of the films with the change of volatilization time when the initial concentration was 10 mg/mL and 20 mg/mL.

|                | Volatilization time |      |       |      |      |       |       |       |       |       |       |       |       |
|----------------|---------------------|------|-------|------|------|-------|-------|-------|-------|-------|-------|-------|-------|
|                | 0s                  | 30s  | 60s   | 90s  | 120s | 150s  | 180s  | 210s  | 240s  | 270s  | 300s  | 330s  | 360s  |
| <b>10mg/mL</b> | 0                   | 4.5% | 21.0% | 29.0 | 32.8 | 34.5% | 35.4% | 35.9% | 36.2% | 36.3% | 36.4% | 36.5% | 36.5% |
| <b>20mg/mL</b> | 0                   | 8.6% | 26.3% | 34.8 | 36.7 | 37.0% | 37.2% | 37.3% | 37.3% | 37.4% | 37.4% | 37.5% | 37.5% |

## REFERENCES

- (1) Huang, L.; Huang, X. N.; Sun, G. N.; Gu, C.; Lu D.; Ma, Y. G. *J. Phys. Chem. C* **2012**, *116*, 7993-7999.
- (2) Gu, C.; Tang, S.; Yang, B.; Liu, S. J.; Lv, Y.; Wang, H.; Yang, S. M.; Hanif, M.; Lu, D.; Shen, F.Z.; Ma, Y. G. *Electrochim. Acta* **2009**, *54*, 7006-7011.
- (3) Ng, M. F.; Sun, S. L.; Zhang, R. Q. *J. Appl. Phys.* **2005**, *97*, 103513.
- (4) Hohenberg, P.; Kohn, W. *Phys. Rev. B* **1964**, *136*, 864-871.
- (5) Runge, E.; Gross, E. K. U. *Phys. Rev. Lett.* **1984**, *52*, 997-1000.
- (6) Hirata, S.; Lee, T. J.; Gordon, M. H. *J. Chem. Phys.* **1999**, *111*, 8904-8912.
- (7) Lee, C.; Yang, W.; Parr, R. G. *Phys. Rev. B* **1988**, *37*, 785-789.
